# Supplementary material for: Changes in Surface Water Quality of the El Salvador River in La Joya de los Sachas, Ecuadorian Amazon Region
Source: MDPI journal article supplement (doi:10.3390/w16091259), 2024-04-28
Supplement: s1 [file s1]

For research article

Supplementary S1

**Table S1.** Relative weights used for the determination of the WQI.

| Parameter        | Unit                   | wi    |
|------------------|------------------------|-------|
| OD               | mg L <sup>-1</sup>     | 0.206 |
| Fecal coliforms  | N 100 mL <sup>-1</sup> | 0.134 |
| SDT              | mg L <sup>-1</sup>     | 0.116 |
| DBO <sub>5</sub> | mg L <sup>-1</sup>     | 0.136 |
| Nitrates         | mg L <sup>-1</sup>     | 0.136 |
| pH               | -                      | 0.156 |
| Turbidity        | NTU                    | 0.116 |

Supplementary S2

**Table S2.** Water Quality Index (WQI).

| Scale     | Rank classification |
|-----------|---------------------|
| Excellent | 91–100              |
| Good      | 71–90               |
| Average   | 51–70               |
| Poor      | 26–50               |
| Very Poor | 0–25                |

**Supplementary S3.** Regulations of the Ministry of Environment, Water and Ecological Transition.

# REGISTRO OFICIAL

Administración del Sr. Ec. Rafael Correa Delgado  
Presidente Constitucional de la República

## EDICIÓN ESPECIAL

Año III - N° 387

Quito, miércoles 4 de noviembre de 2015



TECNOLOGÍA AL SERVICIO DEL DERECHO

### LEY DE PROPIEDAD INTELECTUAL

Art. 92.- El derecho de autor protege también la forma de expresión material, a cual los datos del autor son derechos exclusivos, incluidos e inalienables a los demás.

El presente derecho se otorga a:

a) Los libros, escritos en los libros, los procedimientos, métodos de enseñanza o conceptos matemáticos de él, los programas de el contenido tecnológico a través de los datos (software) en el aprovechamiento técnico o comercial y,

b) Las disposiciones, apuntes y reglamentos, las resoluciones judiciales y los actos ejecutivos, administrativos y dictámenes de los organismos públicos, así como sus trámites, procesos oficiales.

REGISTRO OFICIAL, ÓRGANO DEL GOBIERNO DEL ECUADOR es la encargada de la Corte Constitucional de la República del Ecuador.



Ministerio del Ambiente

Págs.

|                                                                              |    |
|------------------------------------------------------------------------------|----|
| ACUERDOS:                                                                    |    |
| 083-B Refórmese el Libro IX del Texto Unificado de Legislación Secundaria .. | 1  |
| 097-A Refórmese el Texto Unificado de Legislación Secundaria .....           | 6  |
| 140 Expídesse el Marco Institucional para Incentivos Ambientales .....       | 79 |

No. 083-B

Lorena Tapia Núñez  
MINISTRA DEL AMBIENTE

Considerando:

Que, el numeral 25 del artículo 66 de la Constitución de la República del Ecuador, señala que se reconoce y garantiza a las personas el derecho a acceder a bienes y servicios públicos y privados de calidad, con eficiencia, eficacia y buen trato, así como a recibir información adecuada y veraz sobre su contenido y características;

Que, el artículo 154 de la Constitución de la República del Ecuador, establece que a las ministras y ministros de Estado, además de las atribuciones establecidas en la ley, les corresponde: 1. Ejercer la rectoría de las políticas públicas del área a su cargo y expedir los acuerdos y resoluciones administrativas que requiera su gestión;

Supplemental Table 1. Quality criteria of water sources for human and domestic consumption.

TABLA 1: CRITERIOS DE CALIDAD DE FUENTES DE AGUA PARA CONSUMO HUMANO Y DOMÉSTICO

| PARÁMETRO                              | EXPRESADO COMO                       | UNIDAD                      | CRITERIO DE CALIDAD |
|----------------------------------------|--------------------------------------|-----------------------------|---------------------|
| Aceites y Grasas                       | Sustancias solubles en hexano        | mg/l                        | 0,3                 |
| Arsénico                               | As                                   | mg/l                        | 0,1                 |
| Coliformes Fecales                     | NMP                                  | NMP/100 ml                  | 1000                |
| Bario                                  | Ba                                   | mg/l                        | 1                   |
| Cadmio                                 | Cd                                   | mg/l                        | 0,02                |
| Cianuro                                | CN                                   | mg/l                        | 0,1                 |
| Cobre                                  | Cu                                   | mg/l                        | 2                   |
| Color                                  | Color real                           | Unidades de Platino Cobalto | 75                  |
| Cromo hexavalente                      | Cr <sup>+6</sup>                     | mg/l                        | 0,05                |
| Fluoruro                               | F                                    | mg/l                        | 1,5                 |
| Demanda Química de Oxígeno             | DQO                                  | mg/l                        | <4                  |
| Demanda Bioquímica de Oxígeno (5 días) | DBO <sub>5</sub>                     | mg/l                        | <2                  |
| Hierro total                           | Fe                                   | mg/l                        | 1,0                 |
| Mercurio                               | Hg                                   | mg/l                        | 0,006               |
| Nitratos                               | NO <sub>3</sub>                      | mg/l                        | 50,0                |
| Nitritos                               | NO <sub>2</sub>                      | mg/l                        | 0,2                 |
| Potencial Hidrógeno                    | pH                                   | unidades de pH              | 6-9                 |
| Plomo                                  | Pb                                   | mg/l                        | 0,01                |
| Selenio                                | Se                                   | mg/l                        | 0,01                |
| Sulfatos                               | SO <sub>4</sub> <sup>-2</sup>        | mg/l                        | 500                 |
| Hidrocarburos Totales de Petróleo      | TPH                                  | mg/l                        | 0,2                 |
| Turbiedad                              | unidades nefelométricas de turbiedad | UNT                         | 100,0               |

Nota: Podrán usarse aguas con turbiedades y coliformes fecales ocasionales superiores a los indicados en esta Tabla, siempre y cuando las características de las aguas tratadas sean entregadas de acuerdo con la Norma INEN correspondiente.

**Supplemental Table 2. Admissible quality criteria for the preservation of aquatic life and wildlife in fresh, marine and estuarine waters.**

**TABLA 2: CRITERIOS DE CALIDAD ADMISIBLES PARA LA PRESERVACIÓN DE LA VIDA ACUÁTICA Y SILVESTRE EN AGUAS DULCES, MARINAS Y DE ESTUARIOS**

| PARÁMETROS                           | Expresados como                        | Unidad          | Criterio de calidad                           |                           |
|--------------------------------------|----------------------------------------|-----------------|-----------------------------------------------|---------------------------|
|                                      |                                        |                 | Agua dulce                                    | Agua marina y de estuario |
| Aluminio <sup>(1)</sup>              | Al                                     | mg/l            | 0,1                                           | 1,5                       |
| Amoniaco Total <sup>(2)</sup>        | NH <sub>3</sub>                        | mg/l            | -                                             | 0,4                       |
| Arsénico                             | As                                     | mg/l            | 0,05                                          | 0,05                      |
| Bario                                | Ba                                     | mg/l            | 1,0                                           | 1,0                       |
| Berilio                              | Be                                     | mg/l            | 0,1                                           | 1,5                       |
| Bifenilos Policlorados               | Concentración de PCBs totales          | µg/l            | 1,0                                           | 1,0                       |
| Boro                                 | B                                      | mg/l            | 0,75                                          | 5,0                       |
| Cadmio                               | Cd                                     | mg/l            | 0,001                                         | 0,005                     |
| Cianuros                             | CN                                     | mg/l            | 0,01                                          | 0,01                      |
| Cinc                                 | Zn                                     | mg/l            | 0,03                                          | 0,015                     |
| Cloro residual total                 | Cl <sub>2</sub>                        | mg/l            | 0,01                                          | 0,01                      |
| Clorofenoles <sup>(3)</sup>          |                                        | mg/l            | 0,05                                          | 0,05                      |
| Cobalto                              | Co                                     | mg/l            | 0,2                                           | 0,2                       |
| Cobre                                | Cu                                     | mg/l            | 0,005                                         | 0,005                     |
| Cromo total                          | Cr                                     | mg/l            | 0,032                                         | 0,05                      |
| Estaño                               | Sn                                     | mg/l            |                                               | 2,00                      |
| Fenoles monohídricos                 | Expresado como fenoles                 | mg/l            | 0,001                                         | 0,001                     |
| Aceites y grasas                     | Sustancias solubles en hexano          | mg/l            | 0,3                                           | 0,3                       |
| Hidrocarburos Totales de Petróleo    | TPH                                    | mg/l            | 0,5                                           | 0,5                       |
| Hierro                               | Fe                                     | mg/l            | 0,3                                           | 0,3                       |
| Manganeso                            | Mn                                     | mg/l            | 0,1                                           | 0,1                       |
| Materia flotante de origen antrópico | visible                                |                 | Ausencia                                      | Ausencia                  |
| Mercurio                             | Hg                                     | mg/l            | 0,0002                                        | 0,0001                    |
| Níquel                               | Ni                                     | mg/l            | 0,025                                         | 0,1                       |
| Oxígeno Disuelto                     | OD                                     | % de saturación | > 80                                          | > 60                      |
| Piretroides                          | Concentración de piretroides totales   | mg/l            | 0,05                                          | 0,05                      |
| Plaguicidas organoclorados totales   | Organoclorados totales                 | µg/l            | 10,0                                          | 10,0                      |
| Plaguicidas organofosforados totales | Organofosforados totales               | µg/l            | 10,0                                          | 10,0                      |
| Plata                                | Ag                                     | mg/l            | 0,01                                          | 0,005                     |
| Plomo                                | Pb                                     | mg/l            | 0,001                                         | 0,001                     |
| Potencial de Hidrógeno               | pH                                     | unidades de pH  | 6,5 – 9                                       | 6,5 – 9,5                 |
| Selenio                              | Se                                     | mg/l            | 0,001                                         | 0,001                     |
| Tensoactivos                         | Sustancias activas al azul de metileno | mg/l            | 0,5                                           | 0,5                       |
| Nitritos                             | NO <sub>2</sub>                        | mg/l            | 0,2                                           |                           |
| Nitratos                             | NO <sub>3</sub>                        | mg/l            | 13                                            | 200                       |
| DQO                                  | DQO                                    | mg/l            | 40                                            | -                         |
| DBO <sub>5</sub>                     | DBO <sub>5</sub>                       | mg/l            | 20                                            | -                         |
| Sólidos Suspendedos Totales          | SST                                    | mg/l            | max incremento de 10% de la condición natural | -                         |

<sup>(1)</sup> Aluminio: Si el pH es menor a 6,5 el criterio de calidad será 0,005 mg/l

<sup>(2)</sup> Aplicar la Tabla 2a como criterio de calidad para agua dulce

<sup>(3)</sup> Si sobrepasa el criterio de calidad se debe analizar el diclorofenol cuyo criterio de calidad es 0,2 µg/l

**Supplemental Table 4. Parameters of water quality levels for irrigation.**

TABLA 4: PARAMETROS DE LOS NIVELES DE LA CALIDAD DE AGUA PARA RIEGO

| PROBLEMA POTENCIAL                                                                                                                                                                                                | UNIDADES                                                                    | GRADO DE RESTRICCIÓN *                                             |                                                                                  |                                                    |
|-------------------------------------------------------------------------------------------------------------------------------------------------------------------------------------------------------------------|-----------------------------------------------------------------------------|--------------------------------------------------------------------|----------------------------------------------------------------------------------|----------------------------------------------------|
|                                                                                                                                                                                                                   |                                                                             | Ninguno                                                            | Ligero<br>Moderado                                                               | Severo                                             |
| <b>Salinidad: (1)</b><br><u>CE (2) SDT</u><br>(3)                                                                                                                                                                 | <u>milimhos/cm</u><br><u>mg/l</u>                                           | <u>0,7</u><br><u>450</u>                                           | <u>0,7-3,0</u><br><u>450-2000</u>                                                | <u>&gt;3,0</u><br><u>&gt;2000</u>                  |
| <b>Infiltración: (4)</b>                                                                                                                                                                                          |                                                                             |                                                                    |                                                                                  |                                                    |
| <u>RAS=0-3yCE=</u><br><u>RAS=3-6yCE=</u><br><u>RAS=6-</u>                                                                                                                                                         |                                                                             | <u>0,7</u><br><u>1,2</u>                                           | <u>0,7-0,2</u><br><u>1,2-0,3</u><br><u>3,1,9 0</u>                               | <u>&lt;0,2</u><br><u>&lt;0,3</u><br><u>&lt;0,5</u> |
| <u>RAS=12-</u><br><u>20yCE=</u>                                                                                                                                                                                   |                                                                             | <u>2,9</u><br><u>5,0</u>                                           | <u>2,9-1,3</u><br><u>5,0-2,9</u>                                                 | <u>&lt;1,3</u><br><u>&lt;2,9</u>                   |
| <b>Toxicidad por iones</b><br><b>específicos (5) Sodio:</b><br><u>Irrigación superficial RAS (6)</u><br><u>Aspersión</u><br><b>Cloruros:</b><br><u>Irrigación superficial</u><br><u>Aspersión</u><br><b>Boro:</b> | <u>meq/l</u><br><u>meq/l</u><br><u>meq/l</u><br><u>meq/l</u><br><u>mg/l</u> | <u>3,0</u><br><u>3,0</u><br><u>4,0</u><br><u>3,0</u><br><u>0,7</u> | <u>3,0-9,0</u><br><u>3,0</u><br><u>4,0-10,0</u><br><u>3,0 0,7-</u><br><u>3,0</u> | <u>&gt;9</u><br><u>&gt;10</u><br><u>&gt;3</u>      |
| <b>Efectos misceláneos (7)</b><br><u>Nitrógeno (N NO<sub>3</sub> )</u><br><u>Bicarbonato (HCO<sub>3</sub> ) Solo</u><br><u>aspersión</u>                                                                          | <u>mg/l</u><br><u>meq/l</u>                                                 | <u>5,0</u><br><u>1,5</u>                                           | <u>5,0-30,0</u><br><u>1,5-8,5</u>                                                | <u>&gt;30</u><br><u>&gt;8,5</u>                    |
| <b>pH</b>                                                                                                                                                                                                         | Rango normal                                                                |                                                                    | 6,5-8,4                                                                          |                                                    |
| * Es el grado de limitación, que indica el rango de factibilidad para el uso del agua en riego.                                                                                                                   |                                                                             |                                                                    |                                                                                  |                                                    |

## Supplemental Table 6. Water quality criteria for recreational water quality through primary contact.

### 5.1.5 Criterios de calidad para aguas con fines recreativos

Se entiende por uso del agua para fines recreativos, la utilización en la que existe:

- a) Contacto primario, como en la natación y el buceo, incluidos los baños medicinales y
- b) Contacto secundario como en los deportes náuticos y pesca.

Los criterios de calidad para aguas destinadas a fines recreativos mediante contacto primario se presentan a continuación en la TABLA 6.

| TABLA 6: CRITERIOS DE CALIDAD DE AGUAS PARA FINES RECREATIVOS MEDIANTE CONTACTO PRIMARIO* |                                        |                 |                     |
|-------------------------------------------------------------------------------------------|----------------------------------------|-----------------|---------------------|
| PARÁMETRO                                                                                 | EXPRESADO COMO                         | UNIDAD          | CRITERIO DE CALIDAD |
| Parásitos Nemátodos Intestinales                                                          |                                        |                 | Ausencia            |
| Coliformes Fecales                                                                        | NMP                                    | NMP/100 ml      | 200                 |
| Coliformes Totales                                                                        | NMP                                    | NMP/100 ml      | 2000                |
| Compuestos fenólicos                                                                      | Fenol                                  | mg/l            | 0,002               |
| Grasas y aceites                                                                          | Película visible                       |                 | Ausencia            |
| Materia Flotante                                                                          | Visible                                |                 | Ausencia            |
| Oxígeno Disuelto                                                                          | OD                                     | % de saturación | >80                 |
| pH                                                                                        | pH                                     |                 | 6,5 - 8,3           |
| Relación Nitrógeno Fósforo Total                                                          |                                        |                 | 15:1                |
| Tensoactivos                                                                              | Sustancias activas al azul de metileno | mg/l            | 0,5                 |
| La visibilidad al disco Secchi será de por lo menos 2m de profundidad                     |                                        |                 |                     |

\*Siempre y cuando no se refiera a piscinas.

Documento con posibles errores digitalizado de la publicación original. Favor verificar con imagen.

[📄 No borres este documento porque es un buen documento](#)

**Supplementary S4:** Class III water quality standard for fish and livestock as stipulated in Government Regulation no. 82/2001

Table 2. Water quality of River Cihideung, River Clapus, and lake nearby IPB Dramaga campus.

| No | Parameter                    | Class III | Unit       | A1     | A2     | A3        | A4        | A5        |
|----|------------------------------|-----------|------------|--------|--------|-----------|-----------|-----------|
| 1  | Temperature                  | 24-30     | °C         | 25.4   | 29.8   | 26.1      | 26.4      | 30.0      |
| 2  | TDS                          | 1000      | mg/l       | 47.00  | 33.00  | 50.00     | 50.00     | 45.00     |
| 3  | TSS                          | 400       | mg/l       | 81.67  | 8.17   | 17.00     | 24.00     | 26.00     |
| 4  | pH                           | 6-9       | -          | 6.06   | 6.64   | 7.21      | 7.41      | 6.74      |
| 5  | DO                           | ≥ 3       | mg/l       | 4.10   | 5.88   | 5.50      | 5.70      | 6.00      |
| 6  | BOD                          | 6         | mg/l       | 1.15   | 0.84   | 0.61      | 1.68      | 2.14      |
| 7  | COD                          | 50        | mg/l       | 35.68  | 27.79  | 21.78     | 22.16     | 28.73     |
| 8  | N-NO <sub>2</sub>            | 0.06      | mg/l       | 0.0072 | 0.0084 | <0.000028 | <0.000028 | <0.000028 |
| 9  | N-NO <sub>3</sub>            | 20        | mg/l       | 2.0444 | 0.9409 | 2.0608    | 1.4515    | 2.4067    |
| 10 | P-Total                      | 1         | mg/l       | 0.0691 | 0.0608 | 0.0914    | 0.0589    | 0.0736    |
| 11 | Sulfide (S <sup>2-</sup> )   | 0.002     | mg/l       | <0.002 | <0.002 | <0.002    | <0.002    | <0.002    |
| 12 | Free Chlorine                | 0.03      | mg/l       | <0.018 | <0.018 | <0.018    | <0.018    | <0.018    |
| 13 | Arsen (As)                   | 1         | mg/l       | <0.002 | <0.002 | <0.002    | <0.002    | <0.002    |
| 14 | Boron (B)                    | 1         | mg/l       | <0.001 | <0.001 | <0.001    | <0.001    | <0.001    |
| 15 | Fluoride (F)                 | 1.5       | mg/l       | 0.042  | 0.030  | 0.052     | 0.048     | 0.460     |
| 16 | Cadmium (Cd)                 | 0.01      | mg/l       | 0.011  | 0.009  | 0.007     | 0.012     | <0.005    |
| 17 | Chrom VI (Cr <sup>6+</sup> ) | 0.05      | mg/l       | <0.01  | <0.01  | <0.01     | <0.01     | <0.01     |
| 18 | Mercury (Hg)                 | 0.002     | mg/l       | <0.001 | <0.001 | <0.001    | <0.001    | <0.001    |
| 19 | Selenium (Se)                | 0.05      | mg/l       | <0.01  | <0.01  | <0.01     | <0.01     | <0.01     |
| 20 | Zeng (Zn)                    | 0.05      | mg/l       | 0.022  | <0.008 | <0.008    | <0.008    | 0.038     |
| 21 | Copper (Cu)                  | 0.02      | mg/l       | <0.015 | <0.015 | <0.015    | <0.015    | <0.015    |
| 22 | Plumbum (Pb)                 | 0.03      | mg/l       | <0.03  | <0.03  | <0.03     | <0.03     | <0.03     |
| 23 | Cobalt (Co)                  | 0.2       | mg/l       | <0.02  | <0.02  | <0.02     | <0.02     | <0.02     |
| 24 | Phenol                       | 1         | µg/l       | <0.01  | <0.01  | <0.01     | <0.01     | <0.01     |
| 25 | Cyanide                      | 0.02      | mg/l       | <0.01  | <0.01  | <0.01     | <0.01     | <0.01     |
| 26 | Oil and Grease               | 1000      | µg/l       | <0.01  | <0.01  | <0.01     | <0.01     | <0.01     |
| 27 | Detergent-MBAS               | 200       | µg/l       | <0.05  | <0.05  | <0.05     | <0.05     | <0.05     |
| 28 | Coliform Group               | 10000     | MPN/100 ml | 2300   | 400    | 400       | 400       | 2300      |
| 29 | Fecal Coliform               | 2000      | MPN/100 ml | 400    | 0      | 0         | 0         | 400       |
|    | Pollution Index              |           |            | 0.892  | 0.728  | 0.731     | 0.871     | 0.734     |
|    | Status                       |           |            | Good   | Good   | Good      | Good      | Good      |
